# Supplementary material
Source: bioRxiv or medRxiv preprint supplement (https://www.biorxiv.org/highwire/filestream/70894/field_highwire_adjunct_files/0/232231-1.pdf)

**Fig. S1.****A**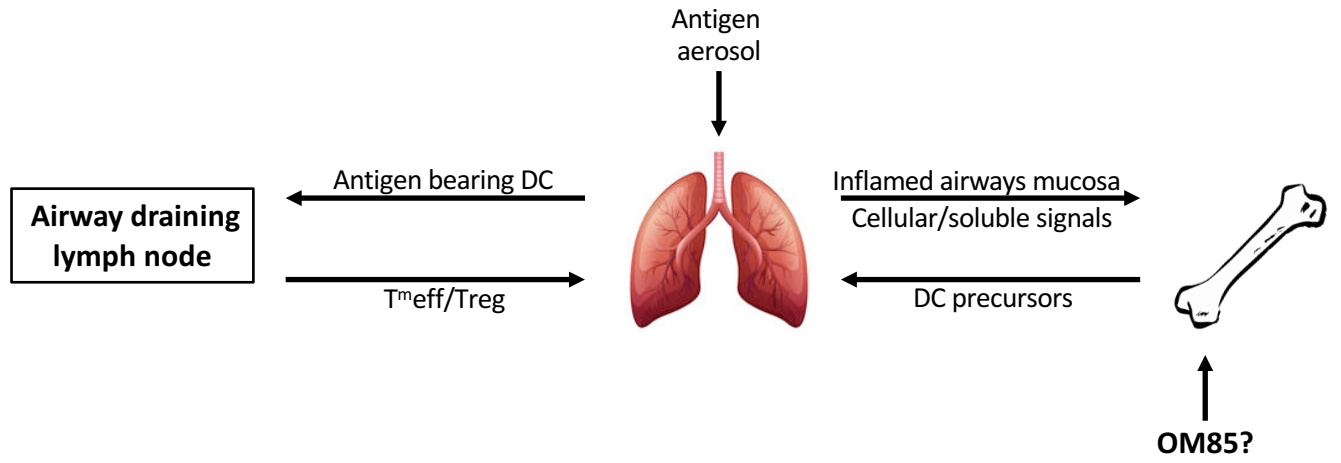**B**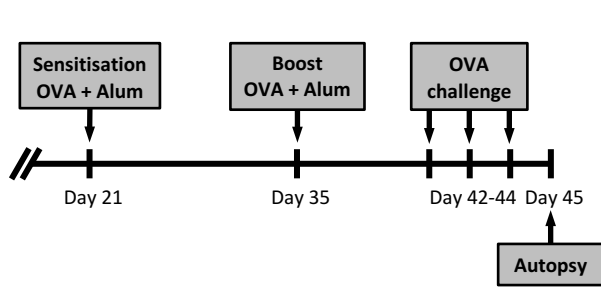**C**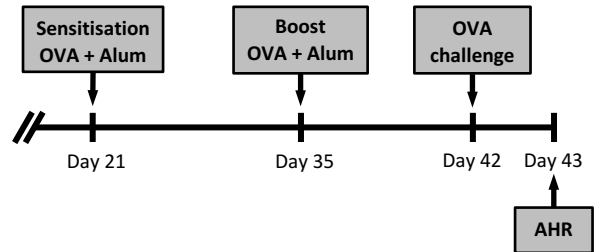**D**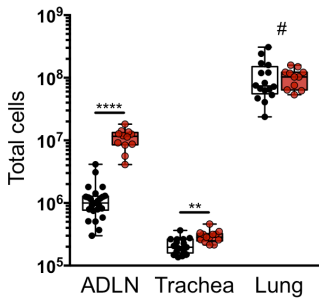**E**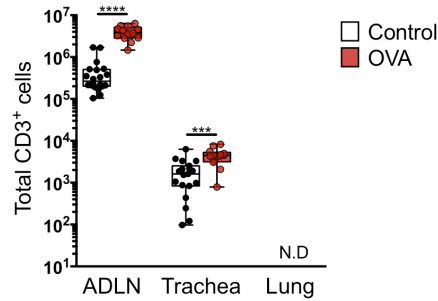**F**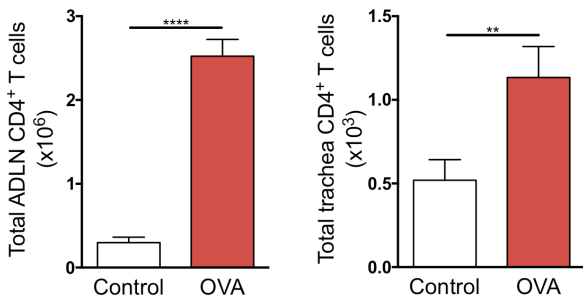**G**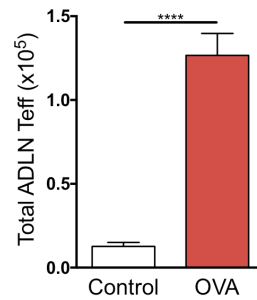**H**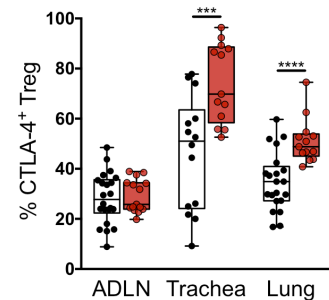**I**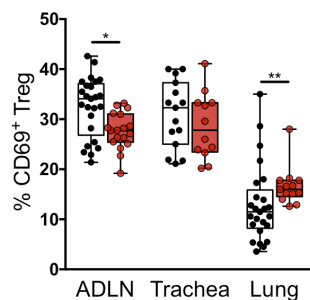

**Fig. S2.**

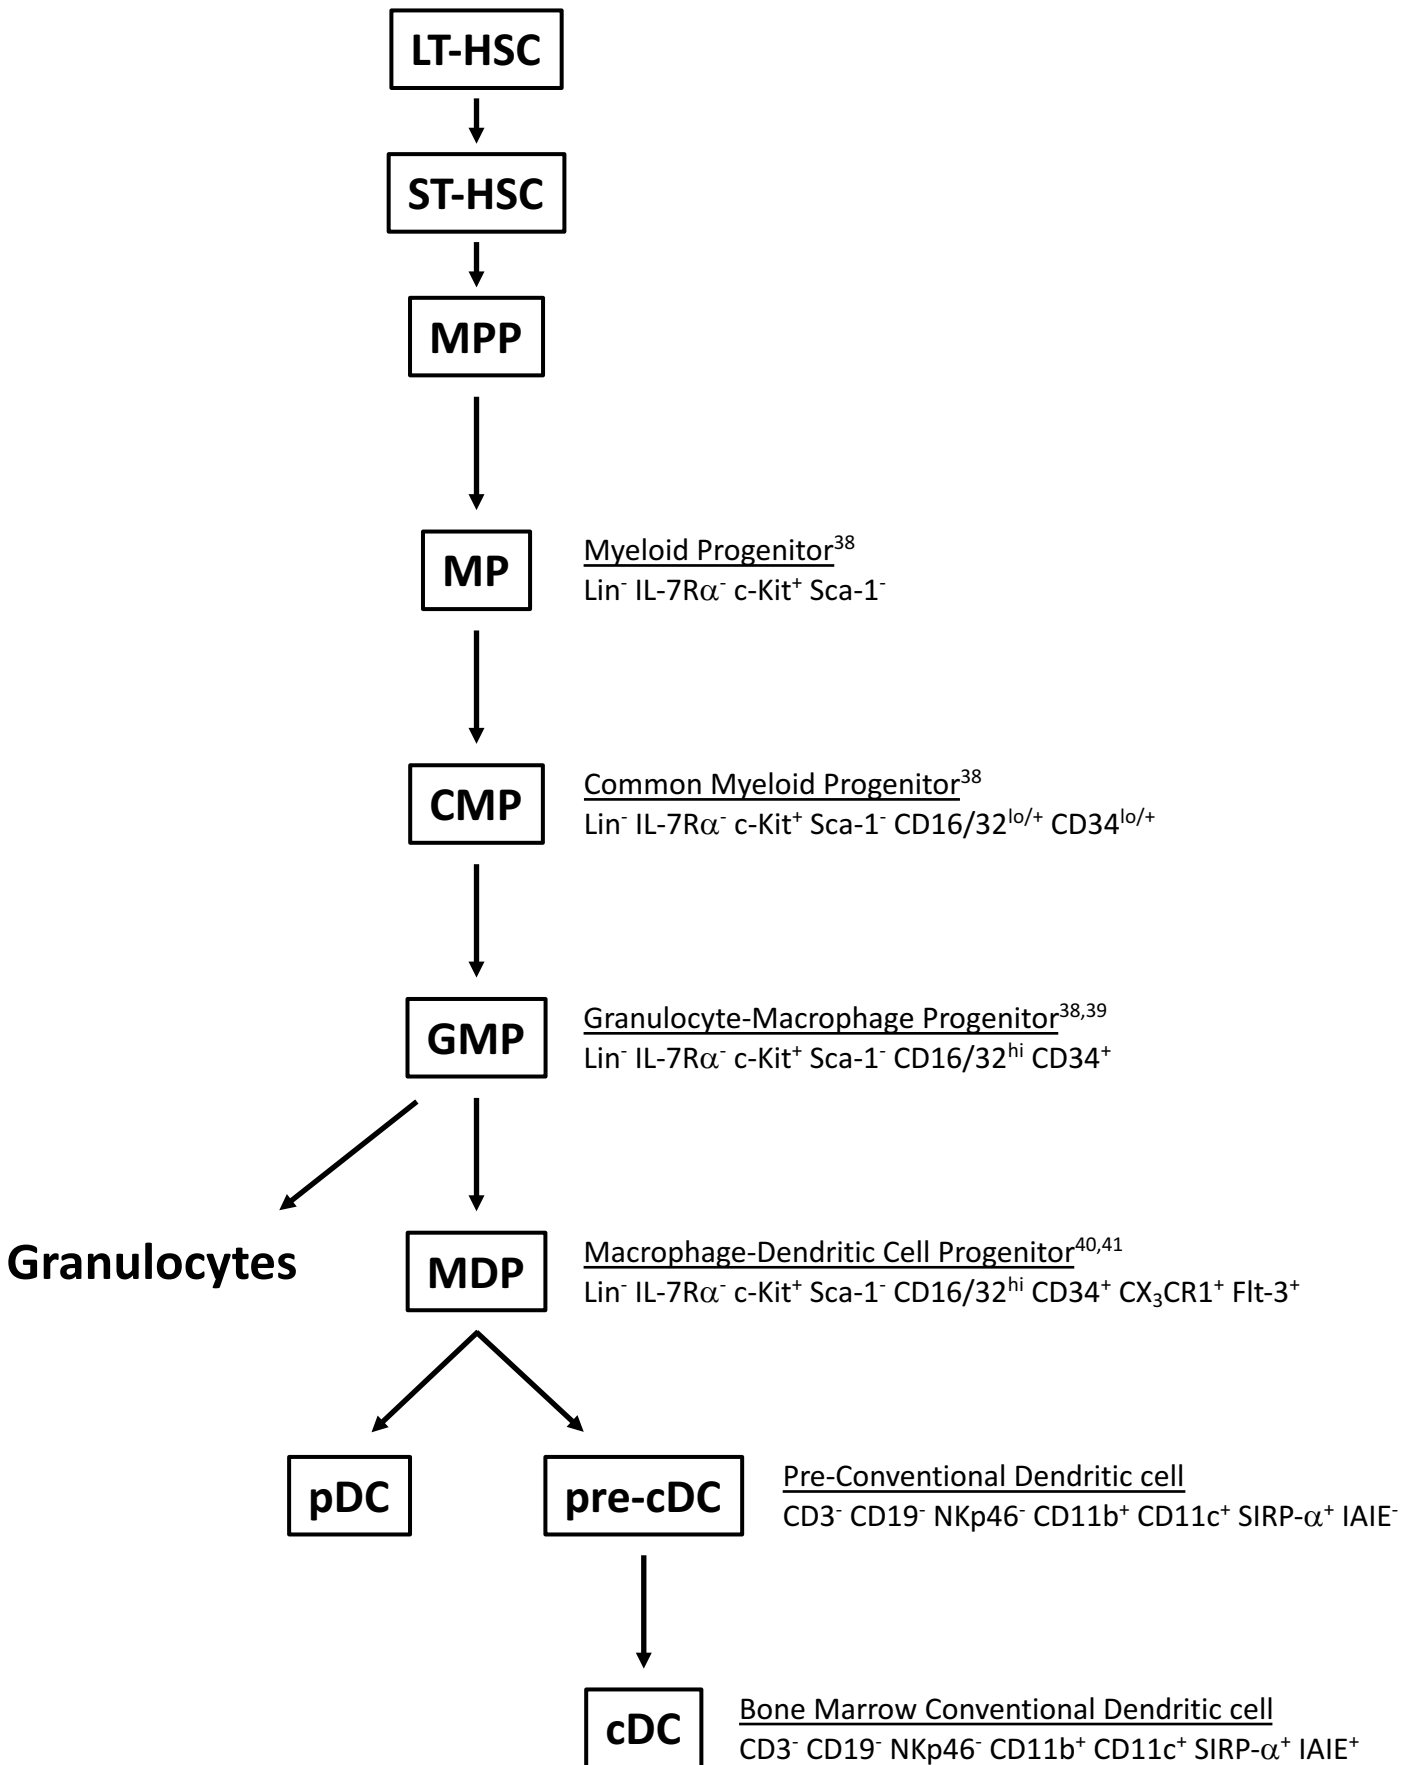

**Fig. S3.**

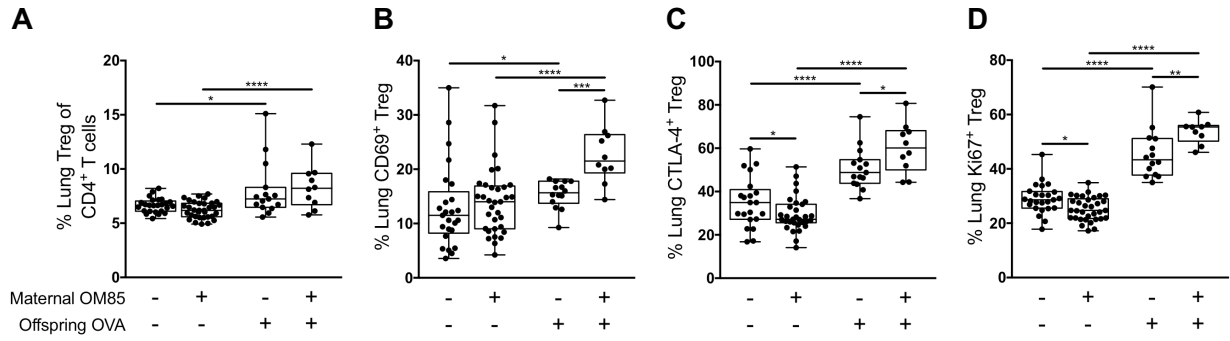

**Fig. S4.**

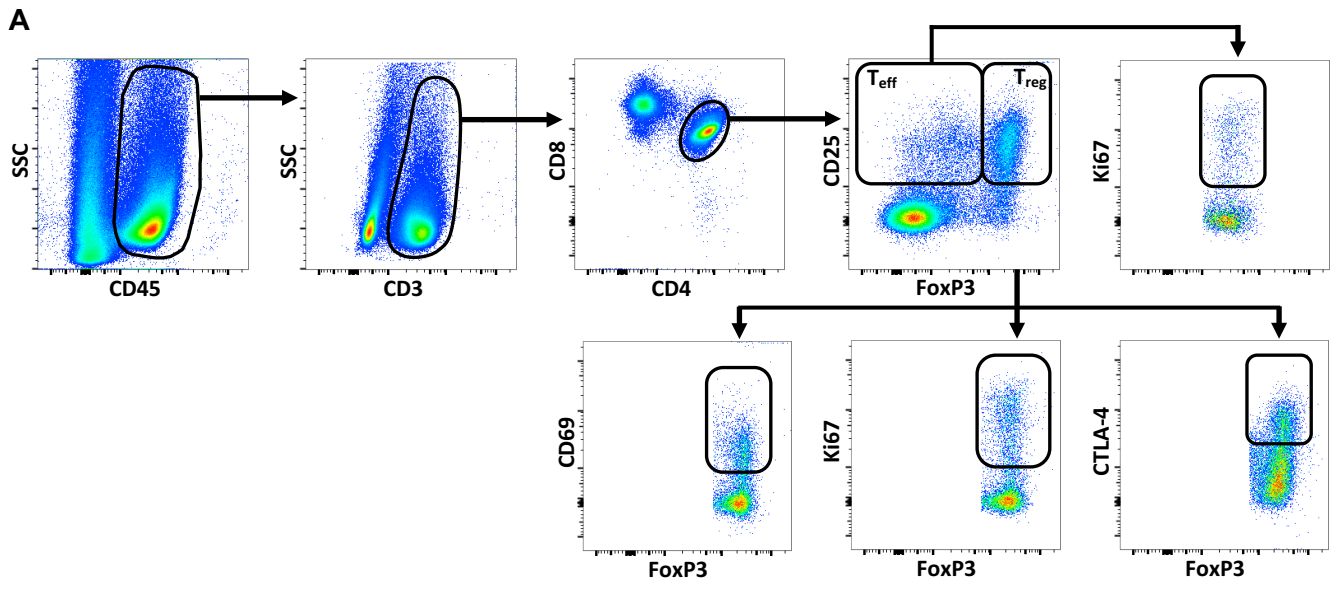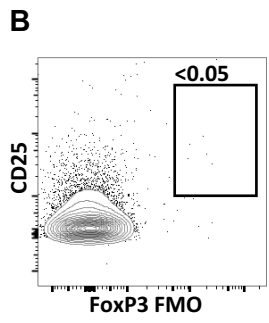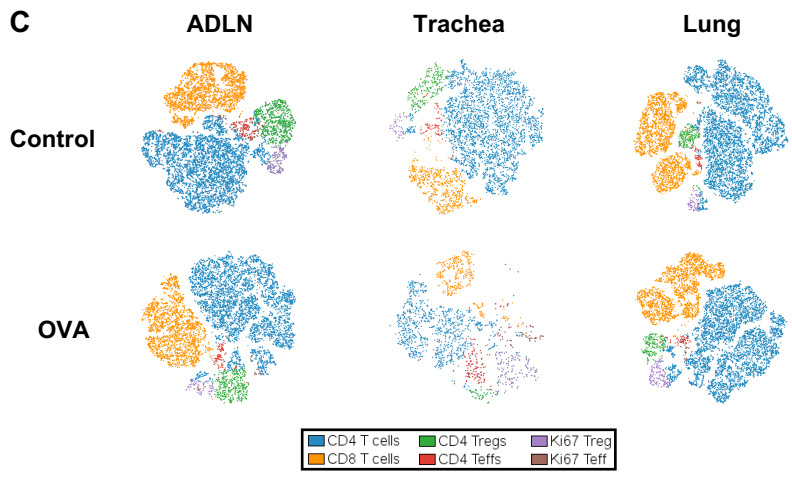

**Fig. S5.**

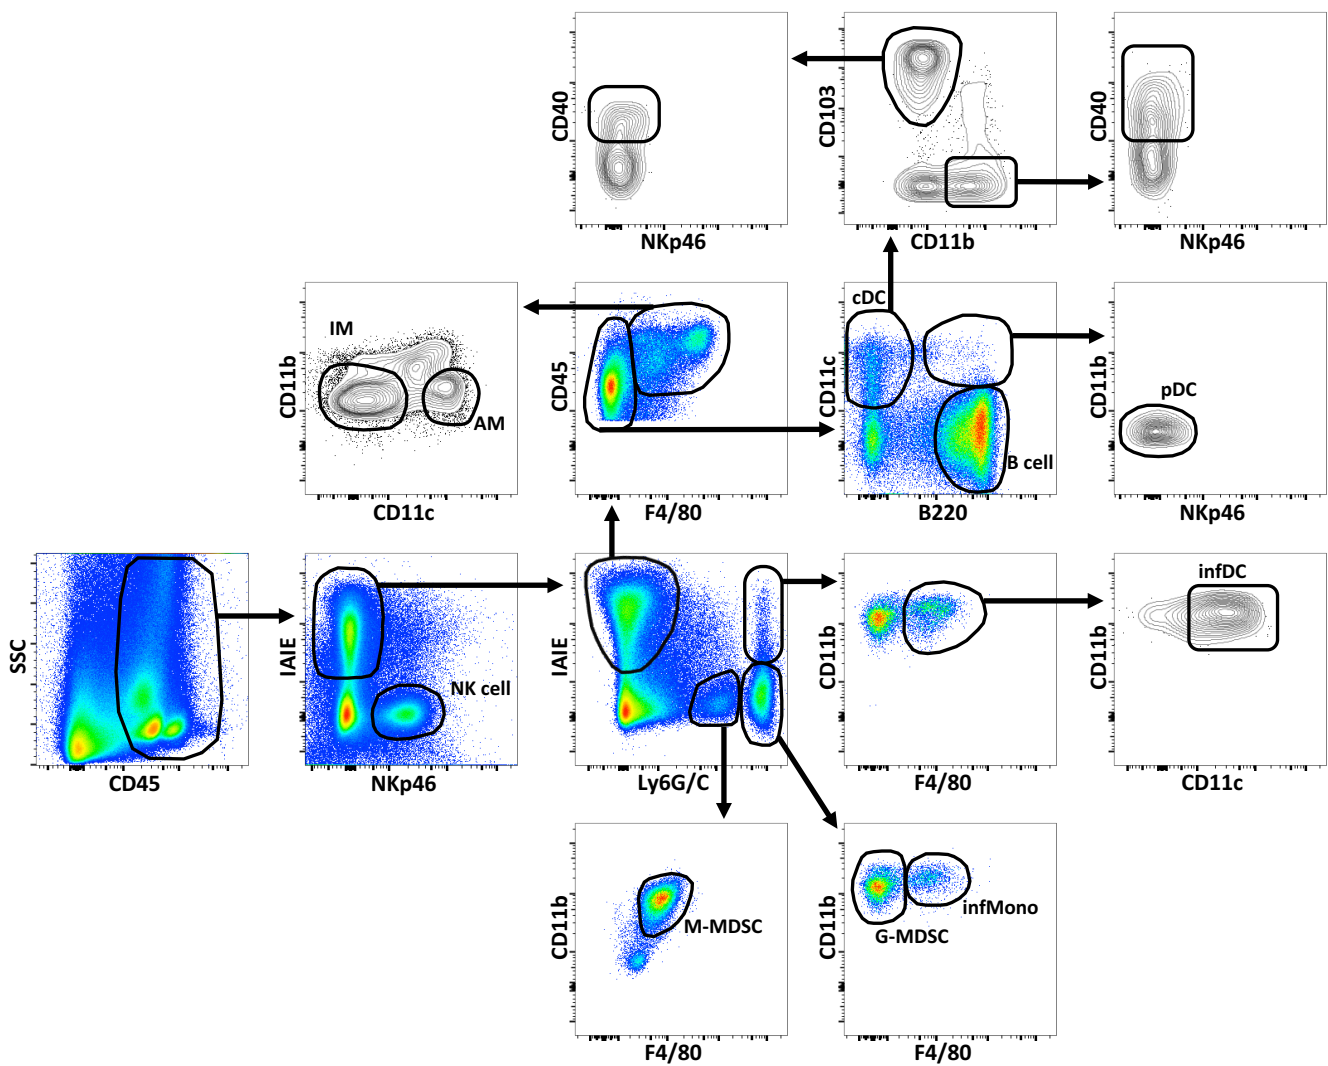

**Fig. S6.**

**A**

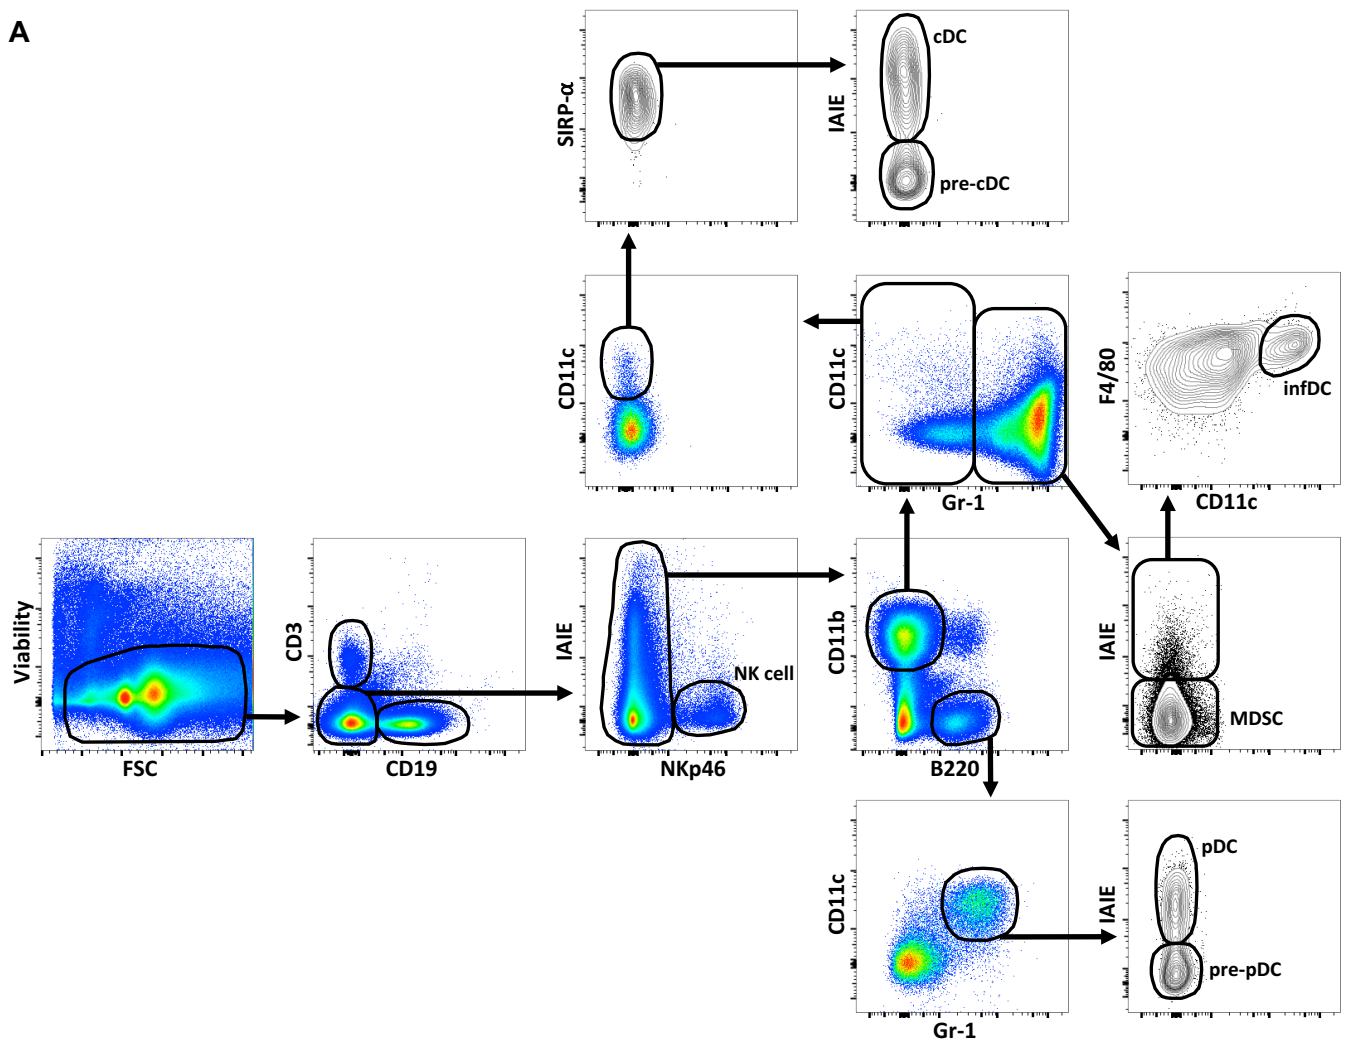

**B**

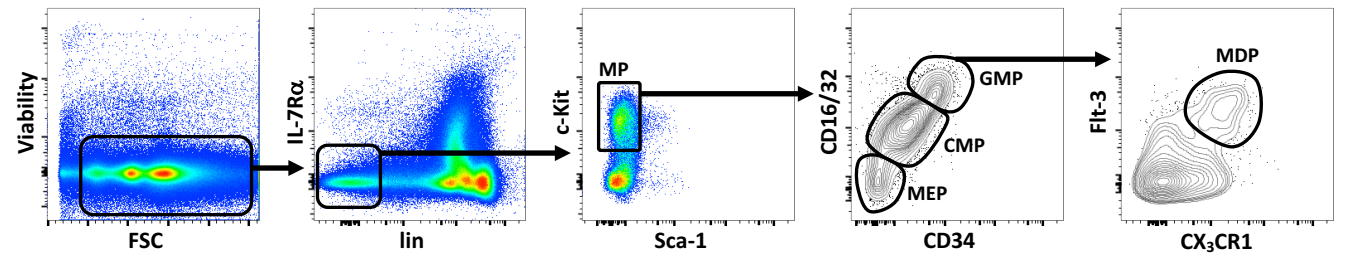

Supplement: Supplementary file [file 232231-1.pdf]
